# Supplementary material
Source: publisher figshare collection journal article supplement (https://gsajournals.figshare.com/ndownloader/files/25587881)
Supplement: Supplementary file 1 [file 25587881]

## Sheet: M1 MLH1 Count
Table S1. Results from Linear Models. Worksheet names indicate model (referenced in Table 2) and dependent variable.
	p values			Coefficients (fixed estimates)	Random Effects (standard deviation)
Subspecies	0.00097		Intercept	26.356
Sex	0		Subspecies Musculus	-0.755
Subspecies*Sex	0.00018		Subspecies Molossinus	-0.482
Strain(random)	0.0001		Sex(male)	-2.649
			Musculus*male	2.953
			Molossinus*male	3.201
			Intercept		1.69
			Strain		1.89

## Sheet: M2 MLH1 Count
M2 MLH1 Count	Estimate	Std. Error	t value	Pr(>|t|)
(Intercept)	24.718	0.447	55.356	0
Subspecies Musculus	0.849	0.714	1.19	0.236
Subspecies Molossinus	2.901	1.729	1.678	0.096
Sex (male)	-1.194	0.692	-1.726	0.087
Strain G	3.301	0.657	5.023	0
Strain LEW	1.694	0.714	2.373	0.019
Strain PWD	0.257	0.704	0.365	0.716
Strain MSM	0.086	1.729	0.05	0.96
Strain SKIVE	0.371	1.761	0.21	0.834
Subspecies Musculus * Sex	-0.768	1.021	-0.753	0.453
Subspecies Molossinus * Sex	-3.185	1.933	-1.648	0.102
Strain G * Sex (male)	-3.144	0.982	-3.201	0.002
Strain LEW * Sex (male)	-1.165	1.09	-1.07	0.287
Strain PWD * Sex (male)	4.444	1.048	4.239	0
Strain MSM * Sex (male)	6.826	2.038	3.349	0.001
Strain SKIVE * Sex (male)	2.26	1.978	1.143	0.255

## Sheet: M3 MLH1 Count
M3 MLH1 Count	Estimate	Std. Error	t value	Pr(>|t|)
(Intercept)	24.718	0.447	55.356	0
Sex (male)	-1.194	0.692	-1.726	0.087
Strain G	3.301	0.657	5.023	0
Strain LEW	1.694	0.714	2.373	0.019
Strain PWD	1.107	0.621	1.783	0.077
Strain MSM	2.988	0.631	4.731	0
Strain MOLF	2.901	1.729	1.678	0.096
Strain SKIVE	1.22	1.729	0.706	0.482
Strain KAZ	0.849	0.714	1.19	0.236
Strain G * Sex (male)	-3.144	0.982	-3.201	0.002
Strain LEW * Sex (male)	-1.165	1.09	-1.07	0.287
Strain PWD * Sex (male)	3.675	1.007	3.651	0
Strain MSM * Sex (male)	3.641	1.173	3.104	0.002
Strain MOLF * Sex (male)	-3.185	1.933	-1.648	0.102
Strain SKIVE * Sex (male)	1.492	1.957	0.762	0.447
Strain KAZ * Sex (male)	-0.768	1.021	-0.753	0.453

## Sheet: M4 Female MLH1 Count
M4 Female MLH1 Count	Estimate	Std. Error	t value	Pr(>|t|)
(Intercept)	24.718	0.466	53.088	0
Subspecies Musculus	0.849	0.744	1.141	0.258
Subspecies Molossinus	2.901	1.803	1.609	0.112
Strain G	3.301	0.685	4.817	0
Strain LEW	1.694	0.744	2.276	0.026
Strain PWD	0.257	0.735	0.35	0.727
Strain MSM	0.086	1.803	0.048	0.962
Strain SKIVE	0.371	1.836	0.202	0.841

## Sheet: M5 Female MLH1 Count
M5 Female MLH1 Count	Estimate	Std. Error	t value	Pr(>|t|)
(Intercept)	24.718	0.466	53.088	0
Strain G	3.301	0.685	4.817	0
Strain LEW	1.694	0.744	2.276	0.026
Strain PWD	1.107	0.647	1.71	0.092
Strain MSM	2.988	0.658	4.537	0
Strain MOLF	2.901	1.803	1.609	0.112
Strain SKIVE	1.22	1.803	0.677	0.501
Strain KAZ	0.849	0.744	1.141	0.258

## Sheet: M4 Male MLH1 Count
M4 Male MLH1 Count	Estimate	Std. Error	t value	Pr(>|t|)
(Intercept)	23.524	0.495	47.53	0
Subspecies Musculus	-1.33	1.03	-1.291	0.202
Subspecies Molossinus	-0.284	0.808	-0.352	0.727
Strain G	0.157	0.684	0.229	0.82
Strain LEW	0.528	0.771	0.685	0.496
Strain PERC	-1.716	1.641	-1.045	0.3
Strain PWD	6.113	1.06	5.769	0
Strain MSM	6.913	1.01	6.843	0
Strain SKIVE	4.042	1.143	3.537	0.001
Strain KAZ	1.411	1.019	1.385	0.172
Strain TOM	3.406	1.807	1.885	0.065
Strain AST	2.703	1.807	1.496	0.14

## Sheet: M5 Male MLH1 Count
M5 Male MLH1 Count	Estimate	Std. Error	t value	Pr(>|t|)
(Intercept)	23.524	0.495	47.53	0
Strain G	0.157	0.684	0.229	0.82
Strain LEW	0.528	0.771	0.685	0.496
Strain PERC	-1.716	1.641	-1.045	0.3
Strain PWD	4.782	0.742	6.442	0
Strain MSM	6.629	0.926	7.159	0
Strain MOLF	-0.284	0.808	-0.352	0.727
Strain SKIVE	2.712	0.857	3.164	0.003
Strain KAZ	0.081	0.684	0.118	0.906
Strain TOM	2.076	1.641	1.265	0.211
Strain AST	1.373	1.641	0.836	0.406
Strain CZECH	-1.33	1.03	-1.291	0.202

## Sheet: M1 Total SC Length 
M1 Total SC Length	p values			Coefficients	Random Effects (standard deviation)
				(fixed estimates)
Subspecies	0.00085		Intercept	1960.2
Sex	0		Subspecies Musculus	-44.1
Subspecies*Sex	0.0001		Subspecies Molossinus	-119.1
Strain(random)	0.0001		Sex(male)	-558
			Musculus*male	167.1
			Molossinus*male	396.9
			Intercept		119
			Strain		263

## Sheet: M2 Total SC Length
M2 Total SC Length	Estimate	Std. Error	t value	Pr(>|t|)
(Intercept)	1683.38	36.479	46.147	0
Subspecies Musculus	229.568	62.002	3.703	0
Subspecies Molossinus	161.137	53.281	3.024	0.003
Strain G	431.238	54.282	7.944	0
Strain LEW	248.684	59.941	4.149	0
Strain PWD	-26.764	61.403	-0.436	0.664
Strain SKIVE	50.076	90.383	0.554	0.58
Sex (male)	-345.005	58.2	-5.928	0
Subspecies Musculus * Sex (male)	-84.338	89.204	-0.945	0.346
Subspecies Molossinus * Sex (male)	243.125	97.055	2.505	0.013
Strain G * Sex (male)	-303.27	84.021	-3.609	0
Strain LEW * Sex (male)	-169.848	94.24	-1.802	0.074
Strain PWD * Sex (male)	121.505	93.03	1.306	0.194
Strain SKIVE * Sex (male)	-119.766	121.449	-0.986	0.326

## Sheet: M3 Total SC Length
M3 Total SC Length	Estimate	Std. Error	t value	Pr(>|t|)
(Intercept)	1683.38	36.479	46.147	0
Strain G	431.238	54.282	7.944	0
Strain LEW	248.684	59.941	4.149	0
Strain PWD	202.805	50.867	3.987	0
Strain MSM	161.137	53.281	3.024	0.003
Strain SKIVE	279.644	83.583	3.346	0.001
Strain KAZ	229.568	62.002	3.703	0
Sex (male)	-345.005	58.2	-5.928	0
Strain G * Sex (male)	-303.27	84.021	-3.609	0
Strain LEW * Sex (male)	-169.848	94.24	-1.802	0.074
Strain PWD * Sex (male)	37.168	86.439	0.43	0.668
Strain MSM * Sex (male)	243.125	97.055	2.505	0.013
Strain SKIVE * Sex (male)	-204.104	116.478	-1.752	0.082
Strain KAZ * Sex (male)	-84.338	89.204	-0.945	0.346

[truncated: 30 more sheets: M4 Female Total SC Length, M5 Female Total SC Length, M4 Male Total SC Length, M5 Male Total SC Length, M1 Short Bivalent SC Length, M2 Short Bivalent SC Length, M3 Short Bivalent SC Length, M4 Female Short Bivalent, M5 Female Short Bivalent, M4 Male Short Bivalent, M5 Male Short Bivalent SCLength, M4 Male Long Bivalent SC Length, M5 Male Long Bivalent SC Length, M1 Norm. Foci Position, M2 Norm. Foci Position, M3 Norm. Foci Position, M4 Female Norm. Foci Position, M5 Female Norm. Foci Position, M4 Male Norm. Foci Position, M5 Male Norm. Foci Position …]
